# Supplementary material for: Female Veterans in Jail Diversion Programs: Differences From and Similarities to Their Male Peers
Source: Atypon-hosted journal article supplement (doi:10.1176/appi.ps.201400442), 2015-08-03
Supplement: appi.ps.201400442.ds001.pdf [file appi.ps.201400442.ds001.pdf]

Table 1. Significant Differences between Female and Male Veterans in the JDTR Diversion Program

| Characteristic                                     | Female Veterans |     | Male veterans |    | P    |
|----------------------------------------------------|-----------------|-----|---------------|----|------|
|                                                    | N               | %   | N             | %  |      |
| Age: mean (M±SD)                                   | 39.6 ±11.3      |     | 41.0 ±13.7    |    | ns   |
| Race                                               |                 |     |               |    | ns   |
| White                                              | 46              | 67  | 662           | 69 |      |
| Black                                              | 18              | 26  | 209           | 22 |      |
| Multi-racial                                       | 4               | 6   | 50            | 5  |      |
| Native American                                    | 1               | 1   | 12            | 1  |      |
| Hispanic                                           | 6               | 9   | 97            | 10 | ns   |
| Education                                          |                 |     |               |    | .070 |
| Some college or more                               | 47              | 68  | 518           | 54 |      |
| HS Diploma                                         | 21              | 30  | 402           | 42 |      |
| Less than high school                              | 1               | 1   | 36            | 4  |      |
| Living situation in past 30 days                   |                 |     |               |    | ns   |
| Own Home                                           | 34              | 49  | 436           | 46 |      |
| Unstably Housed                                    | 19              | 28  | 238           | 25 |      |
| Homeless                                           | 9               | 13  | 167           | 17 |      |
| Separated from Military                            | 63              | 91  | 857           | 90 | ns   |
| Honorable/General/Medical Discharge                | 69              | 100 | 932           | 97 | ns   |
| Discharged 5 years or more                         | 47              | 68  | 587           | 61 | ns   |
| Believe military contrib. to medical problem       | 54              | 78  | 714           | 75 | ns   |
| Believe military contrib. to mental health problem | 60              | 87  | 764           | 80 | ns   |
| VA Service-connected disability                    | 23              | 33  | 300           | 31 | ns   |
| Military service Era                               |                 |     |               |    |      |
| Vietnam                                            | 1               | 1   | 159           | 17 | .001 |
| Post-Vietnam                                       | 23              | 33  | 299           | 31 | ns   |
| Persian Gulf                                       | 17              | 25  | 224           | 23 | ns   |
| Afghanistan-Iraq                                   | 39              | 57  | 476           | 50 | ns   |
| Military Service Branch                            |                 |     |               |    |      |
| Army                                               | 43              | 62  | 599           | 63 | ns   |
| Navy                                               | 11              | 16  | 155           | 16 | ns   |
| Marines                                            | 6               | 9   | 146           | 15 | ns   |
| Air Force                                          | 8               | 12  | 75            | 8  | ns   |
| Criminal Justice Involvement                       |                 |     |               |    |      |
| Ever on probation                                  | 42              | 61  | 647           | 68 | ns   |
| Spent time in prison due to conviction             | 31              | 45  | 487           | 51 | ns   |
| Ever had a restraining order                       | 16              | 23  | 357           | 37 | .028 |
| Current restraining order                          | 8               | 12  | 200           | 21 | ns   |
| Previous arrest history                            | 57              | 83  | 825           | 87 | ns   |
| Age at first arrest(M±SD)                          | 28.6± 10.2      |     | 24.0 ± 11.5   |    | .002 |
| First arrest under 18                              | 12              | 17  | 261           | 27 | . ns |
| History of mental health treatment                 | 63              | 91  | 767           | 80 | .025 |
| History of substance abuse treatment               | 45              | 65  | 686           | 72 | ns   |
| Substance Use                                      |                 |     |               |    |      |
| Any alcohol use in past 30 days                    | 26              | 38  | 562           | 59 | .001 |
| Heavy alcohol use in past 30 days                  | 10              | 15  | 248           | 26 | .044 |

|                                                |          |      |          |       |      |
|------------------------------------------------|----------|------|----------|-------|------|
| Any illegal drug use in past 30 days           | 26       | 38   | 382      | 40    | ns   |
| Mental Health Problems                         |          |      |          |       |      |
| Meet criteria for PTSD (PCL-C)                 | 52       | 75   | 621      | 65    | .050 |
| PCL-C Sum Severity Score(M±SD)                 | 58± 17.3 |      | 52± 18.2 |       | .013 |
| Mod. to extreme difficulty: B24 Full           | 30       | 43   | 258      | 27    | .003 |
| Mod.-extreme diff.: B24 Depression             | 45       | 65   | 382      | 40    | .000 |
| Mod.-extreme diff.: B24 Self Harm              | 9        | 13   | 66       | 7     | .042 |
| Lifetime Trauma                                |          |      |          |       |      |
| Any Lifetime trauma                            | 68       | 99   | 917      | 96    | ns   |
| Any sexual assault in lifetime                 | 47       | 68   | 173      | 18    | .000 |
| Trauma Under 18                                |          |      |          |       |      |
| Any trauma under 18                            | 51       | 74   | 683      | 71    | ns   |
| Any sexual assault                             | 33       | 48   | 162      | 17    | .000 |
| Past 12 Months                                 |          |      |          |       |      |
| Any trauma past 12 months                      | 40       | 58   | 556      | 58    | ns   |
| Any sexual assault                             | 14       | 20   | 10       | 1     | .000 |
| Served in combat zone                          | 26       | 38   | 555      | 58    | .004 |
| Six-Month Respondents                          |          | N=40 |          | N=617 |      |
| Sexual assault in Military                     | 23       | 58   | 30       | 5     | .001 |
| Combat military trauma                         |          | N=21 |          | N=371 |      |
| Experienced any type of military combat trauma | 19       | 90   | 358      | 96    | ns   |
| Shot at or received fire                       | 17       | 79   | 305      | 82    | ns   |
| In areas with landmines or IEDs                | 16       | 74   | 305      | 82    | ns   |
| Seeing, smelling, or handling dead bodies      | 13       | 63   | 274      | 74    | ns   |
| Saw someone seriously injured or killed        | 12       | 57   | 311      | 84    | .004 |
| Attacked or ambushed                           | 10       | 47   | 274      | 74    | .014 |
| Shooting or directing fire at enemy            | 9        | 43   | 255      | 69    | .014 |
| Providing aid to someone seriously injured     | 9        | 43   | 208      | 56    | ns   |
| Wounded or injured                             | 6        | 28   | 131      | 35    | ns   |
